# Supplementary material for: Molecular specializations of deep cortical layer analogs in songbirds
Source: PubMed Central journal article supplement (PMC7599217; doi:10.1038/s41598-020-75773-4), 2020-10-30

Supplemental Figure 1

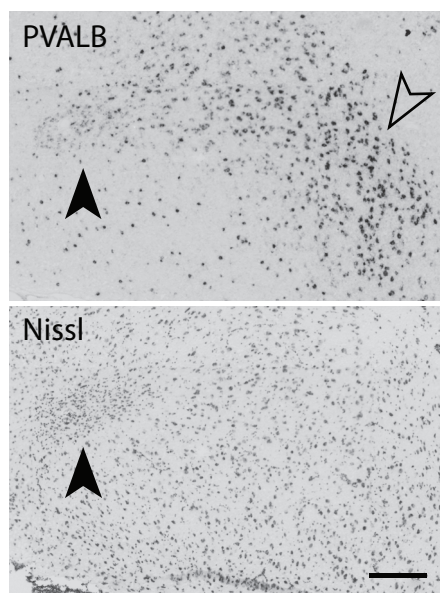

Supplemental Figure 2

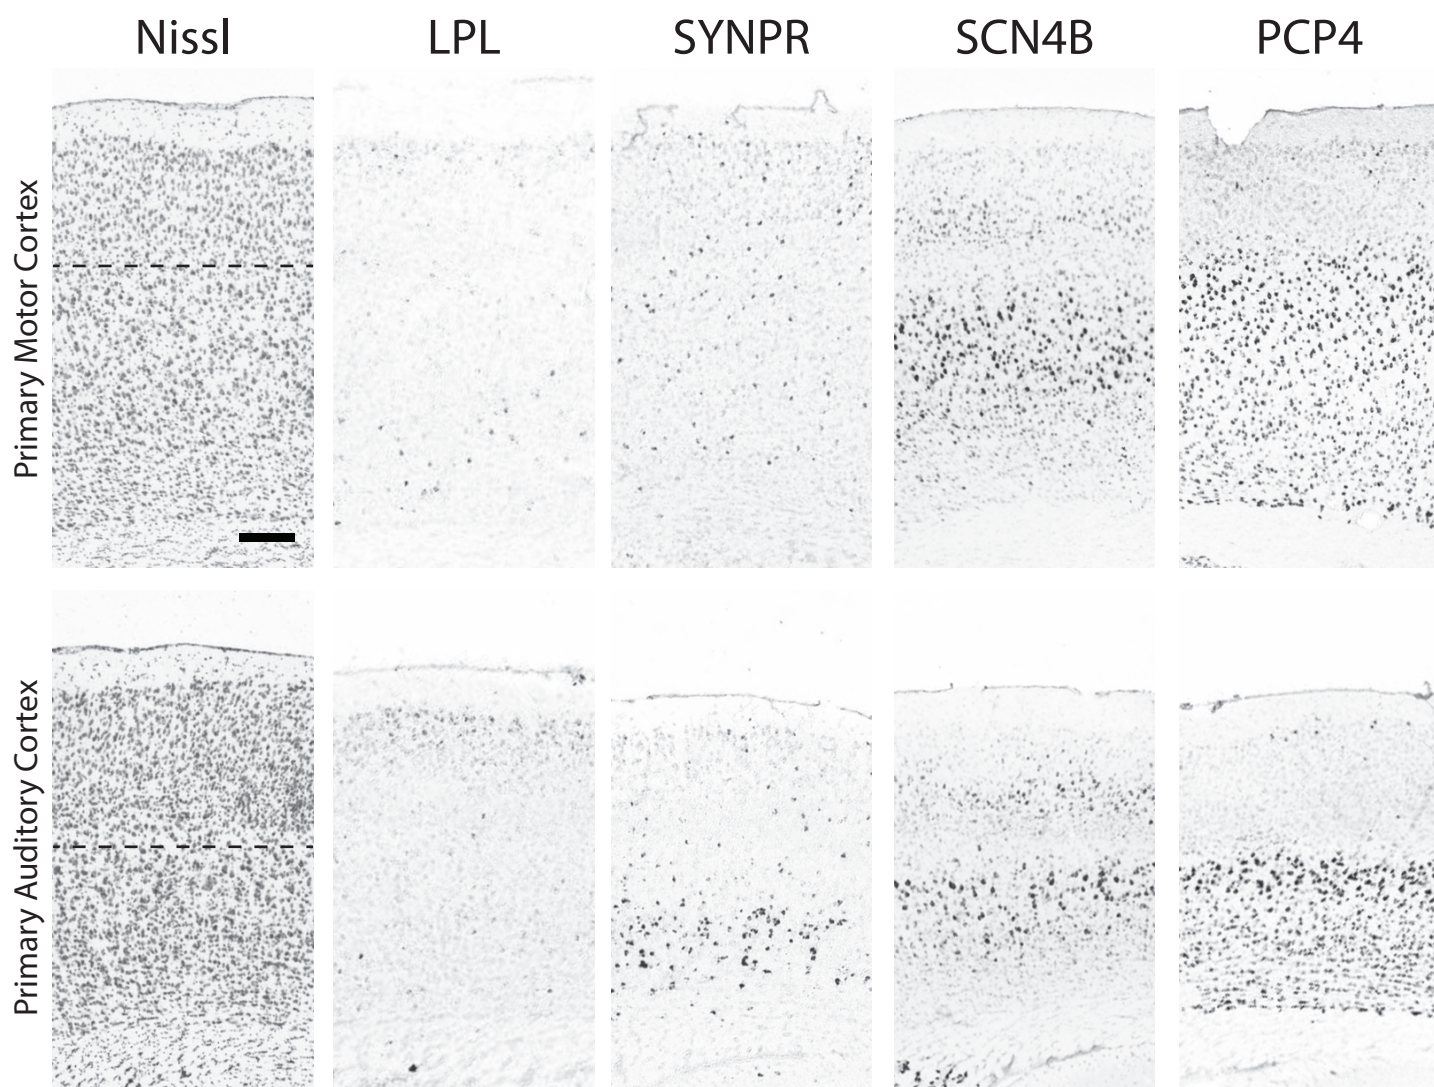

Supplement: 41598_2020_75773_MOESM1_ESM.pdf [file 41598_2020_75773_MOESM1_ESM.pdf]
